# Supplementary material
Source: PubMed Central journal article supplement (PMC4957138)
Supplement: NIHMS793628-supplement-supplement_1.pdf [file NIHMS793628-supplement-supplement_1.pdf]

**A practical Bayesian stepped wedge design for community-based cluster-randomized  
clinical trials: the British Columbia Telehealth Trial**

**Supplementary Material**

```

library(snowfall)

#### statistical significance level ####

alpha = 0.1

#### number of clusters/ sample size per cluster ####

p = 50; n = 20

#### number of time periods (every 2 weeks) ####

t = p+1 # 1 for each cluster plus baseline

#### true log RR in hosp/ER (control,treatment) ####

theta.s = log(c(0.7,0.8,0.85,0.9,1))

#### number of simulations ####

n.sim = 1000

start = Sys.time()

for (i in 1:length(theta.s)){ # loop over scenarios

set.seed(4206)

# sfSetMaxCPUs(number = 32) # need if using more than 32 cores

sfInit(parallel = TRUE, cpus = 10,type = "MPI")

sfLibrary(rjags); sfLibrary(boot)

##### function to loop over for simulation #####

kevin = function(xxx,d,int = 2){ #int = time interval (2 or 3 weeks)

alpha = 0.1

```

```

#### number of clusters/ sample size per cluster ####
p = 50; n = 20

#### number of time periods (every 2 weeks) ####
t = p+1 # 1 for each practice plus baseline

## simulated truth for log RR ##
theta.s = log(c(0.7,0.8,0.85,0.9,1))

## expected hosp days/yr per clinic ##
E.yr = rep(n*.36,p) # for each cluster in a year
E.it = E.yr/52 # for each cluster in a 1 wk interval

## number of iterations for inference ##
n_iter = 5000

## treatment indicator variable, 1 = present ##
x = matrix(1,nrow = p,ncol = t)
x[lower.tri(x,diag = T)] = 0

## cluster effects and time trend ##
a = rnorm(p,0,0.5) # a = rep(0,p)
b = log(1:t) - log(t/2) # b = rep(0,t)

#### simulating data ####
dat = array(NA,dim = c(p,t))

dat[,1] = rpois(p,exp(log(int*E.it)+rep(b[1], p) + a ))# baseline, at t = 1: no treatment/device
for (i in 2:t){ # max cluster, p, is last to receive trt
dat[,i] = array(c(rpois((i-1),exp(log(int*E.it[1:(i-1)]))+rep(theta.s[d], i-1)+rep(b[i], i-1) + a[1:(i-
1] ) )),rpois((p -(i-1)),exp(log(int*E.it[1:(p -(i-1)]))+rep(b[i], p -(i-1) ) +a[i:p]))),dim = c(p))

```

```

#theta.s[d] = 0 for type I error
}

dat.E = matrix(rep(int*E.it,t),nrow = p)

#### calling JAGS in R ####

jags_works = 0; attempt = 1

while (jags_works == 0){

jags = try( jags.model(file = "kevin_jags.txt", data = list("t" = t,"p" = p, "y" = dat,"E" =
dat.E,"x" = x),inits = list("a" = rep(0,p),"b" = rep(0,t),"theta.x" = 0, "prec" = 0.5),quiet=T) )

jags_works = as.numeric(length(jags) > 1 | attempt == 10)

attempt = attempt + 1

}

update(jags,1000) # more burn-in

my.samples = coda.samples(jags, variable.names = c("a","b","theta.x"), n.iter = n_iter)

check.this = coda.samples(jags, variable.names = c("sigma.a"),n.iter = n_iter)

samples = my.samples[[1]]

trt.effect = exp(samples[(p+t+1)])

l = as.numeric(quantile(samples[(p+t+1)],c(alpha/2))) # 90% BIC

u = as.numeric(quantile(samples[(p+t+1)],c(1-alpha/2)))

R.h0 = ifelse(u < 0,1,0) # one-sided

out = c(as.numeric(apply(samples,2,mean)),mean(trt.effect),R.h0,exp(l),exp(u),
mean(check.this[[1]]))

return(out) }

##### end func #####

```

```

sfExport("kevin")

## apply loop over func ##

list.results = sfSapply(1:n.sim,kevin,d = i)

sfStop()

results = matrix(unlist(list.results),ncol = n.sim, nrow = (p+t+6))

} # end loop over simulations

Sys.time() - start

##### JAGS script #####

model{

  for ( j in 1:p ){ # cluster

    for ( k in 1:t ){ # time period

      y[j,k] ~ dpois(lambda[j,k])

      log(lambda[j,k]) <- log(E[j,k]) + a[j] + b[k] + x[j,k]*theta.x

    }

  }

  # priors

  theta.x ~ dnorm(0, 10)

  for (i in 1:p){ # cluster effect

    a[i] ~ dnorm(0 , prec) }

  for (i in 1:t){ # fixed effect

    b[i] ~ dnorm(0 , 1/10) }

  prec ~ dgamma(.1,1)

  sigma.a <- 1/prec

} # end model

```
